# Supplementary material for: Postconditioning by Delayed Administration of Ciclosporin A: Implication for Donation after Circulatory Death (DCD)
Source: MDPI journal article supplement (doi:10.3390/ijms232112858), 2022-10-25
Supplement: s1 [file s1]

# Postconditioning by Delayed Administration of Ciclosporin A: implication for Donation after Circulatory Death (DCD)

René Ferrera, Marie Vedère, Megane Lo Grasso, Lionel Augeul, Christophe Chouabe, Gabriel Bidaux and Delphine Baetz

## SUPPLEMENTARY DATA

### S1 Principle of CRC measurement (schematic diagram)

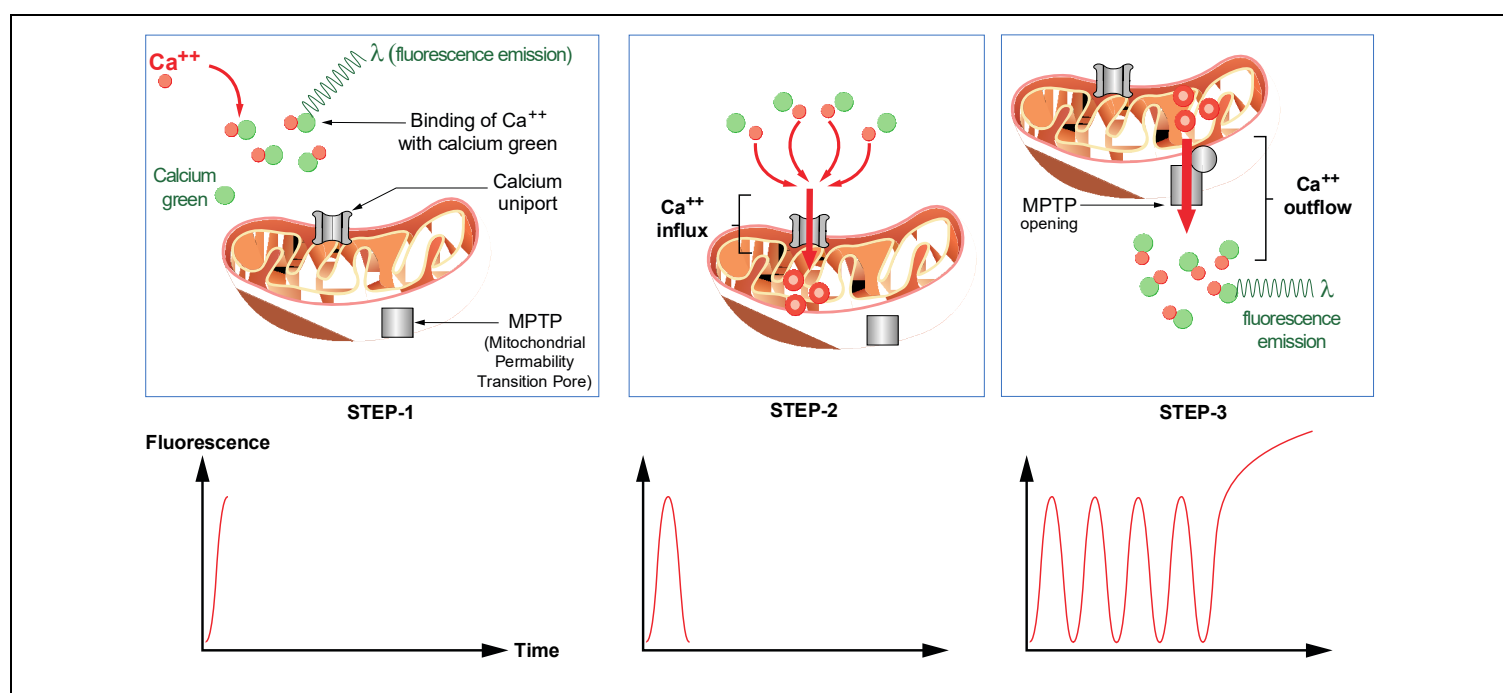

**Figure S1 of supplementary data: method for Calcium Retention Capacity**

Calcium retention capacity (CRC) was defined here as the amount of  $\text{Ca}^{2+}$  required to trigger a massive  $\text{Ca}^{2+}$  release by isolated cardiac mitochondria.

For each of the 10 groups, mitochondria pellets were divided into four similar aliquots (250  $\mu\text{g}$  proteins, determined by using the method of Bradford) Each aliquot was resuspended in 2 ml buffer (150 mM sucrose, 50 mM KCl, 2 mM  $\text{KH}_2\text{PO}_4$ , in 20 mM Tris/HCl, pH 7.4) and CRC was measured in the presence of:

- malate (5 mM) + glutamate (5 mM), substrates of complex I,

- succinate (5 mM), substrate of complex II,

**STEP-1.** Mitochondria (250 µg proteins) were gently stirred for 2 min at 25°C. At the end of this preincubation period, 5 µL CaCl<sub>2</sub> at 1 mM (= pulse of 10 nmol Ca<sup>2+</sup> per mg mitochondrial proteins) were added. Calcium was linked with calcium green-5N (0.5 µM, Molecular Probes™, which induced a fluorescence emission at 530 nm wavelength (and under excitation at 500 nm wavelength). Calcium pulse was recorded as a peak of fluorescence (i.e., a peak of extramitochondrial calcium concentration).

**STEP-2.** Ca<sup>2+</sup> was then rapidly taken up by the mitochondria (Ca<sup>2+</sup> influx, calcium uniport), resulting in a return of extramitochondrial calcium concentration to near baseline level. This operation was repeated every min, forming a series of fluorescence peaks.

**STEP-3.** Following sufficient calcium loading, extramitochondrial Ca<sup>2+</sup> concentration abruptly increased (calcium outflow), indicating a massive release of the accumulated Ca<sup>2+</sup> by mitochondria due to MPTP opening. The amount of CaCl<sub>2</sub> necessary to trigger this massive Ca<sup>2+</sup> release (CRC) was used as an indicator of the susceptibility of mPTP to Ca<sup>2+</sup> overload.

## S2- Result of CRC with stimulation of complex I

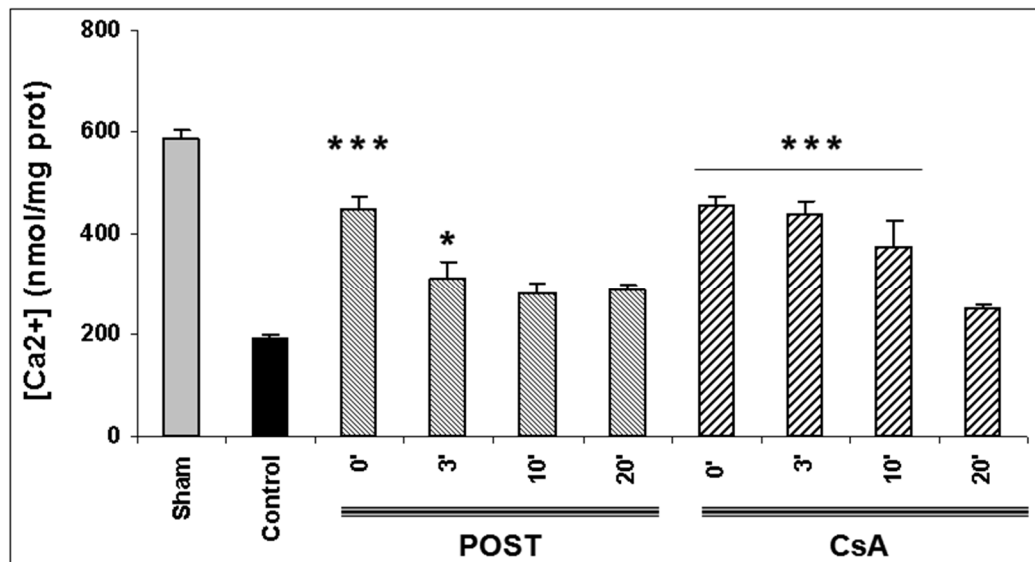

**Figure S2 of supplementary data**

The effect of CsA and POST on mitochondrial permeability transition pore (MPTP) opening was indirectly determined by measuring by CRC under stimulation of complex I substrates (glutamate, malate, pyruvate). In the sham group, during the presence of complex I substrates, the amount of Ca<sup>2+</sup> required to open the MPTP, averaged 595±41 nmol/mg proteins. CsA treatment led to a higher CRC in groups CsA-3 and CsA-10 ( $p < 0.001$ ), whereas MPTP inhibition was abolished from delayed POST 10. \*  $p < 0.05$  and \*\*\*  $p < 0.001$  vs control.

### S3- ROS under stimulation of complex II

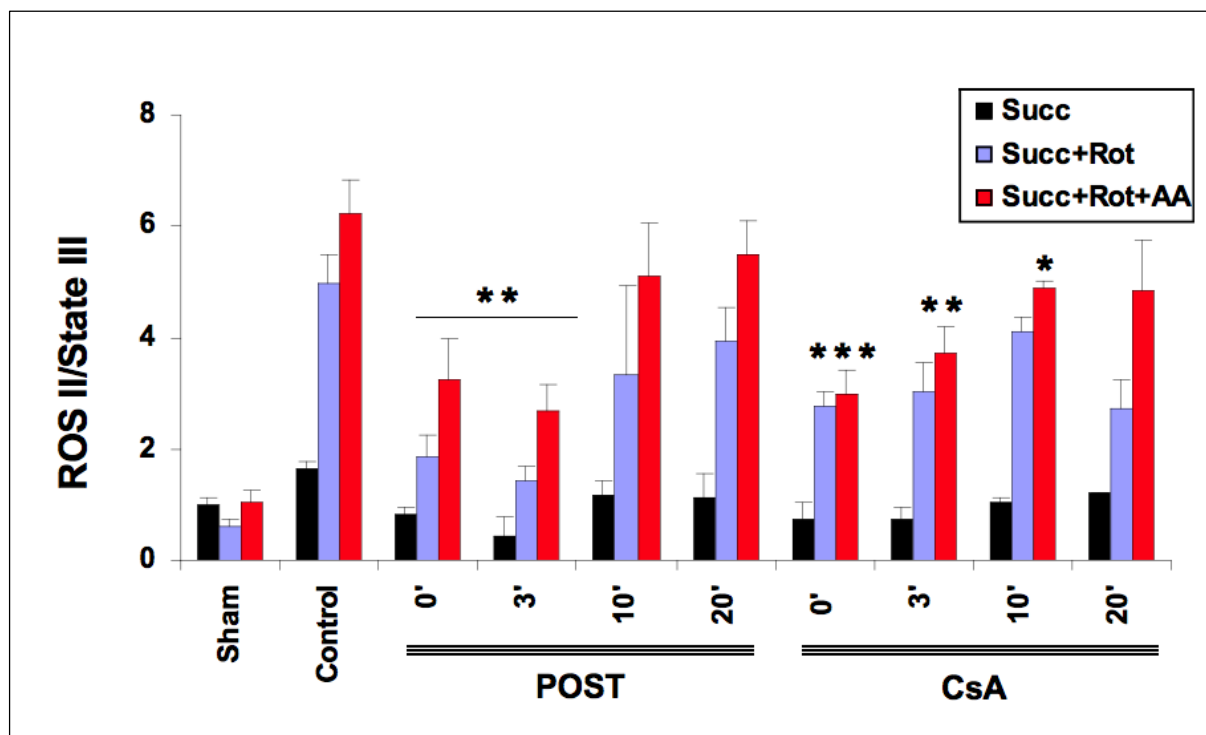

**Figure S3 of supplementary data**

Extramitochondrial H<sub>2</sub>O<sub>2</sub> index assessed in the presence of succinate (Succ), substrate of complex II, Succ + rotenone (Rot) and Succ + rotenone + antimycin (AA). 10 minutes after the onset of reperfusion, H<sub>2</sub>O<sub>2</sub> index remained lower in delayed CsA group but returned to control values in delayed POST-10 and -20.

Abbreviations: CsA for cyclosporine A and POST for ischemic postconditioning. N=6 hearts/group. \* $p < 0.05$ , \*\* $p < 0.01$  and \*\*\* $p < 0.001$  vs. control.

#### S4- Additive effect of CsA and Post-C

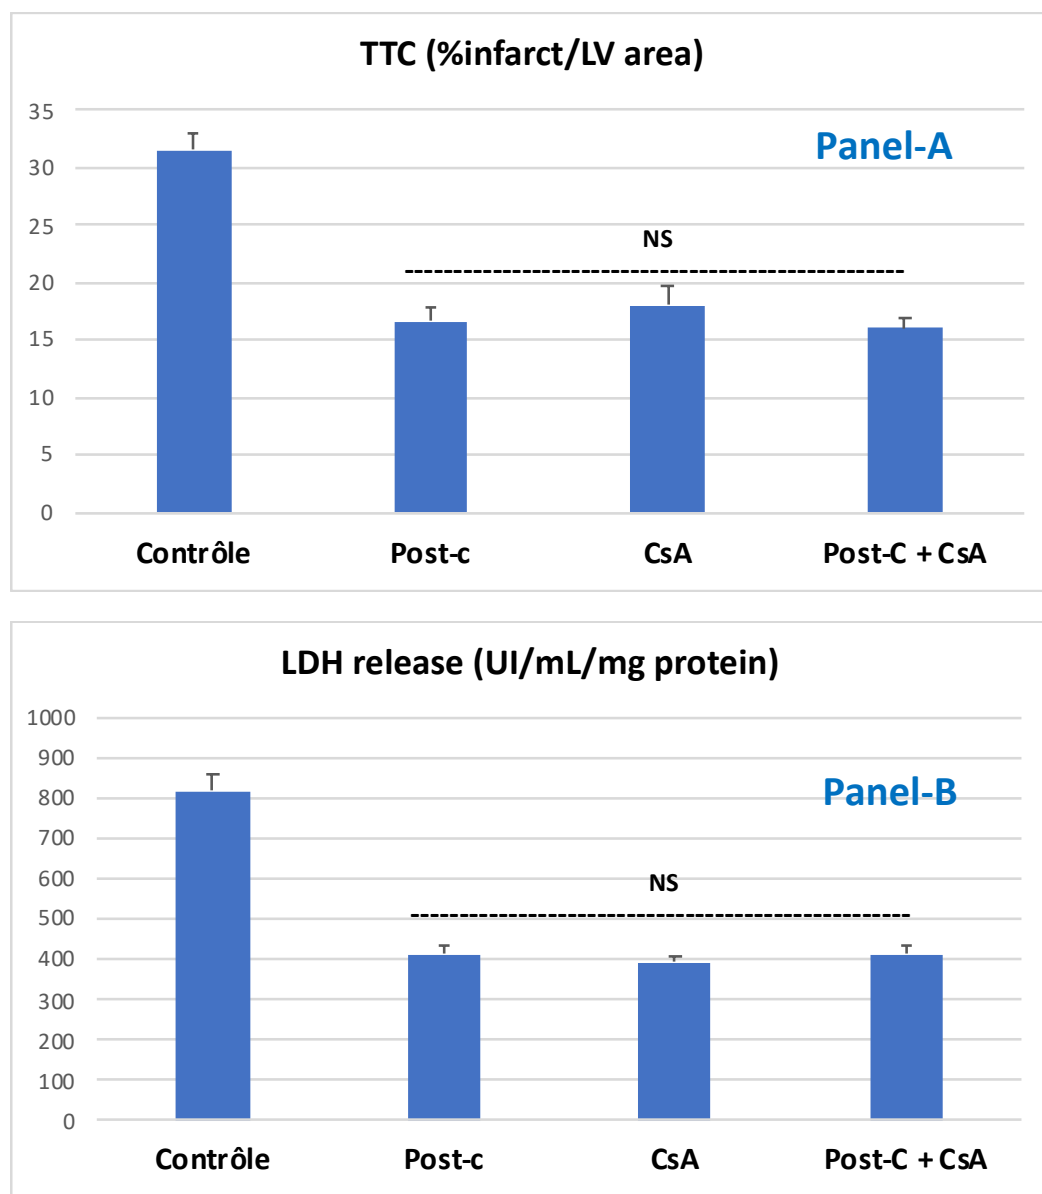

**Figure S4 of supplementary data**

In the parallel experiment, the potential additive effect of POST + CsA was assessed on myocardial necrosis. The same ischemia-reperfusion sequence with 40 min warm ischemia followed by 60 min reperfusion was used (see Figure-1) on isolated rat hearts. When the 2 cardioprotective maneuver were used simultaneously, no additive effect (ns = no significant) was observed regarding myocardial necrosis as assessed by TTC staining (Panel-A) or LDH leakage (Panel-B).
